# Supplementary material
Source: publisher site journal article supplement (https://www.dovepress.com/get_supplementary_file.php?f=+414926.docx)
Supplement: Supplementary file 1 [file get_supplementary_file.php]

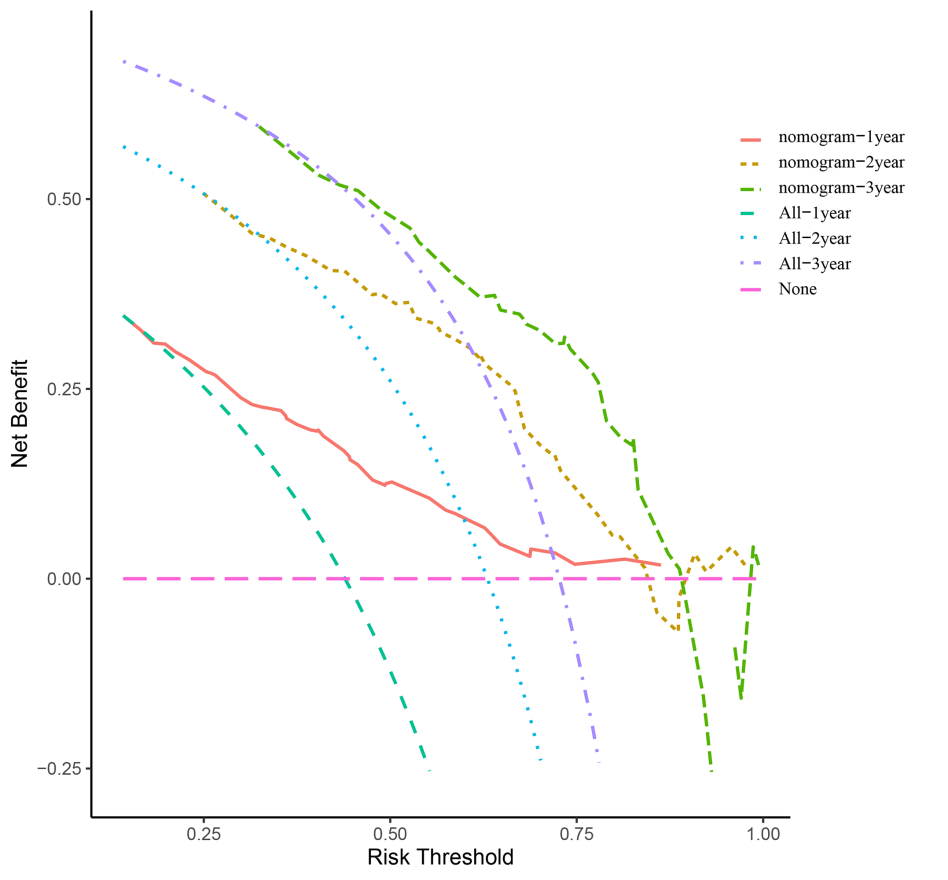


Supplementary Figure 1 Decision curve analyses (DCA) curve based on valid cohort


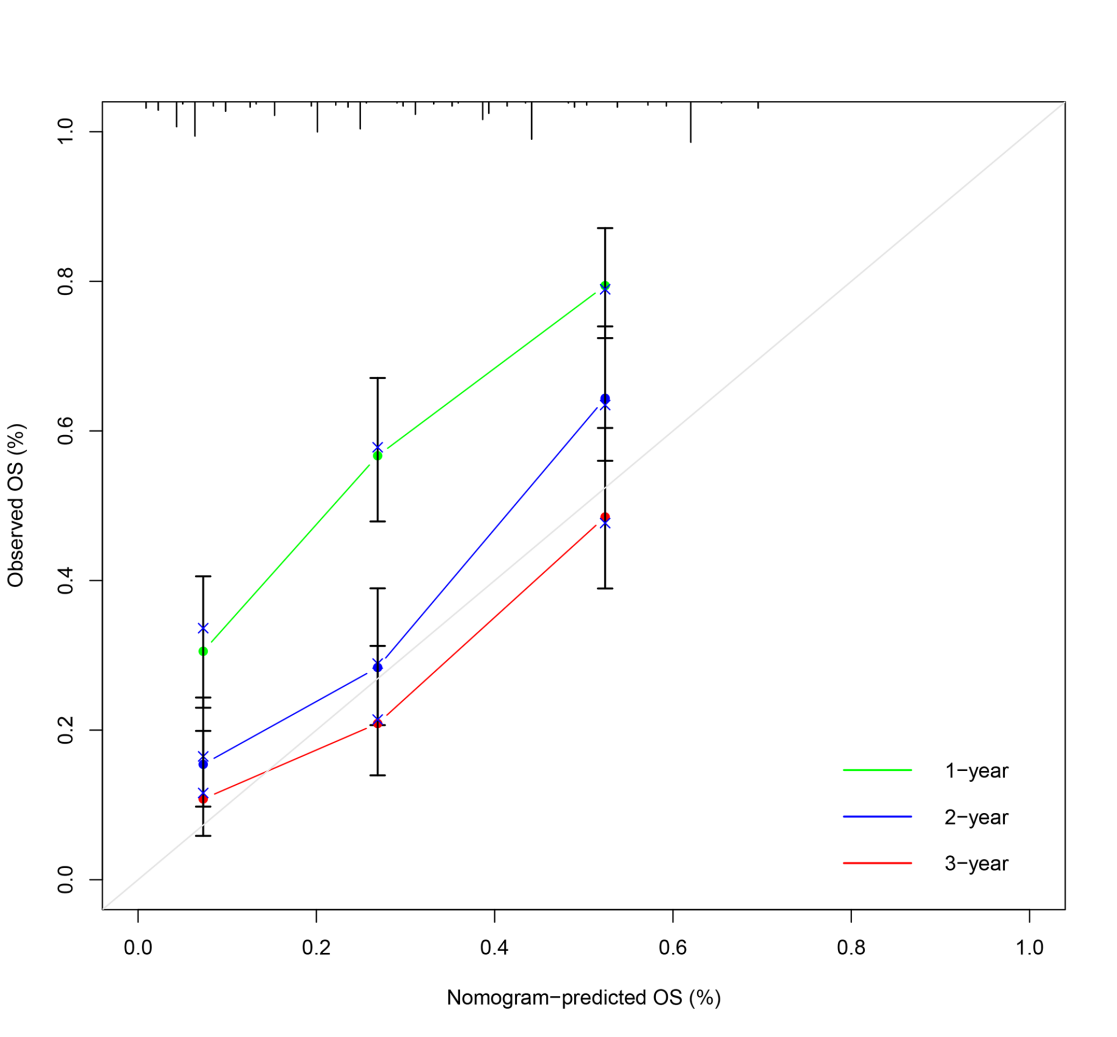


Supplementary Figure 2 Calibration curve based on valid cohort
